# Supplementary material for: Progesterone attenuates neurological deficits and exerts a protective effect on damaged axons via the PI3K/AKT/mTOR-dependent pathway in a mouse model of intracerebral hemorrhage
Source: PubMed Central journal article supplement (PMC9004566; doi:10.18632/aging.203954), 2022-03-19
Supplement: aging-14-203954-s001.pdf [file aging-14-203954-s001.pdf]

## SUPPLEMENTARY TABLES

**Supplementary Table 1. 1, 3, 7 days after ICH was modeled, mice scored in individual task.**

|    | <b>Body symmetry</b> | <b>Gait</b> | <b>Climbing</b> | <b>Circling behavior</b> | <b>Front limb symmetry</b> | <b>Compulsory circling</b> | <b>Whisker response</b> |
|----|----------------------|-------------|-----------------|--------------------------|----------------------------|----------------------------|-------------------------|
| 1d | 3±0.63               | 2.5±0.55    | 2.67±0.52       | 2.83±0.75                | 2.83±0.41                  | 2.5±0.55                   | 2.5±0.55                |
| 3d | 2.17±0.41            | 2±0         | 2±0.63          | 2.5±0.55                 | 2.33±0.52                  | 2.5±0.55                   | 1.83±0.41               |
| 7d | 1.33±0.52            | 1.17±0.41   | 1.17±0.41       | 1.17±0.41                | 1.33±0.52                  | 1.17±0.41                  | 0.67±0.52               |

**Supplementary Table 2. Mice scored in individual task in ICH and ICH+PROG group.**

|          | <b>Body symmetry</b> | <b>Gait</b> | <b>Climbing</b> | <b>Circling behavior</b> | <b>Front limb symmetry</b> | <b>Compulsory circling</b> | <b>Whisker response</b> |
|----------|----------------------|-------------|-----------------|--------------------------|----------------------------|----------------------------|-------------------------|
| ICH      | 1.83±0.41            | 2.33±0.52   | 2.67±0.52       | 2.83±0.41                | 2±0.63                     | 2.83±0.41                  | 1.33±0.82               |
| ICH+PROG | 1.67±0.75            | 1.83±0.41   | 2.17±0.41       | 1.83±0.41                | 1.33±0.52                  | 1.83±0.75                  | 1.33±0.52               |
